# Supplementary material
Source: HighWire-hosted journal article supplement (https://bmjopen.bmj.com/content/14/3/e083479)
Supplement: inline-supplementary-material-2 [file inline-supplementary-material-2.pdf]

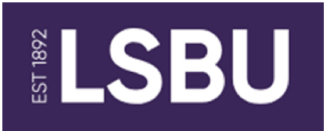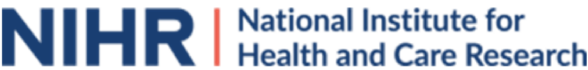

EMERGENT: Evaluating embers: Digitally supporting children’s mental health

CONSENT FORM

Name of Researcher:

If you agree, please initial box

|                                                                                                                                                                                                                                                                                   |  |
|-----------------------------------------------------------------------------------------------------------------------------------------------------------------------------------------------------------------------------------------------------------------------------------|--|
| I confirm that I have read the information sheet dated xxx (version xxx) for this study. I have had the opportunity to consider the information, ask questions and have had these answered satisfactorily.                                                                        |  |
| I agree to take part in an interview as a parent/caregiver participant.                                                                                                                                                                                                           |  |
| I agree that my child .....(full name of child) may take part in an interview.                                                                                                                                                                                                    |  |
| I understand that participation is voluntary and that myself or my child are free to withdraw at any time without giving any reason.                                                                                                                                              |  |
| I agree to the interview being audio-recorded.                                                                                                                                                                                                                                    |  |
| I agree to the use of anonymised quotes in research reports and publications.                                                                                                                                                                                                     |  |
| I understand that anonymous data generated by the study will be retained in accordance with the <a href="#">University's Code of Practice</a> for 5 years by London South Bank University, and indefinitely in the LSBU Open Research and Open Science Framework data repository. |  |
| I understand that if me and my child decide to take part in the study that we are still free to withdraw at any time (up to the point the results are written up, estimated as June 2025).                                                                                        |  |

|                                                      |                             |                                  |
|------------------------------------------------------|-----------------------------|----------------------------------|
| <div></div> <div>Name of Participant</div>           | <div></div> <div>Date</div> | <div></div> <div>Signature</div> |
| <div></div> <div>Name of Person taking Consent</div> | <div></div> <div>Date</div> | <div></div> <div>Signature</div> |

Parents Interview Consent Form  
IRAS Project Number: 331410  
Version 3.0  
1

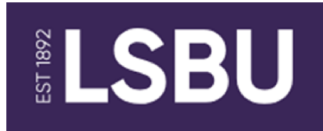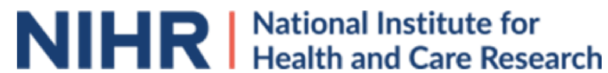

To find out more about the study, you can contact a member of the research team:

[chewj2@lsbu.ac.uk](mailto:chewj2@lsbu.ac.uk), or the study's co-principal investigators: Prof. Daniel Frings

([fringsd@lsbu.ac.uk](mailto:fringsd@lsbu.ac.uk)) and Prof. Paula Reavey ([reaveyp@lsbu.ac.uk](mailto:reaveyp@lsbu.ac.uk)). If you have concerns

about the ethical conduct of the study, you should contact the School of Applied Sciences

Ethics committee ([SASethics@lsbu.ac.uk](mailto:SASethics@lsbu.ac.uk)).

If you feel that you would like to speak to someone further about any issues arising from the interview - Relate, a UK charity, offers counselling support and has several centres across the UK. More information on their services is available on their website:

<https://www.relate.org.uk/>. You can also contact YoungMinds, a UK charity focusing on children and young people's mental health at their website: <https://www.youngminds.org.uk/>, and ChildLine on their website: <https://www.childline.org.uk>.
