# Supplementary material
Source: HighWire-hosted journal article supplement (https://bmjopen.bmj.com/content/14/3/e083479)
Supplement: inline-supplementary-material-3 [file inline-supplementary-material-3.pdf]

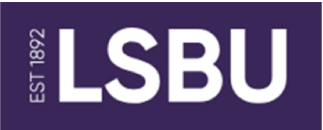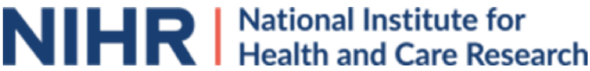

EMERGENT: Evaluating embers digitally supporting children’s mental health

Child Assent Form

Participant ID:

Researcher Name:

Researcher Signature:

Child’s name:

Date:

\_\_\_\_\_

Emergent Study Contact Details:

emergent@lsbu.ac.uk

Do you have any questions?

Tell us what they are.

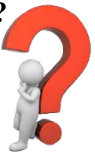

Has someone talked to you about the study?

YES

☐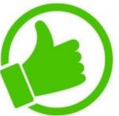

NO

☐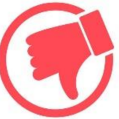

Do you agree to take part?

YES

☐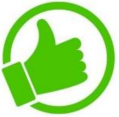

NO

☐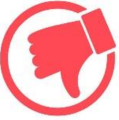

Do you know that you can stop at any time?

YES

☐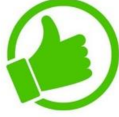

NO

☐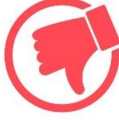

Child assent form for interviews  
IRAS Project Number: 331410  
Version 2.0
